# Supplementary material
Source: publisher figshare collection journal article supplement (https://sage.figshare.com/ndownloader/files/23454524)
Supplement: Supplementary file 1 [file 23454524]

**ICAR-NATIONAL RESEARCH CENTRE ON EQUINES**  
**SIRSA ROAD, HISAR**

*IAEC, ICAR-NRCE, Meeting 2020-Proceedings*

NRCE/CPCSEA/2019-20

DATED 15/02/2020

A MEETING OF THE Institute Animal Ethics Committee (IAEC) was held on 15/02/2020 at 1100 AM under the Chairmanship of Dr Nitin Virmani, Principal Scientist, NRCE, Hisar in the Committee room of National Research Centre on Equines, Hisar, Haryana to examine the requirement of experimental animals, in various research products of the NRCE, Hisar. The IAEC critically examined the proposals. Following officials were present in the meeting:

- Dr Nitin Virmani, Chairman, IAEC (NRCE, Hisar)
- Dr Harbans Lal- Main CPCSEA Nominee
- Mr Anil Kamboj- (Non-Scientific Socially Aware Member)
- Dr Sanjay Kumar, Principal Scientist, Veterinarian
- Dr Balwinder Kumar, Principal Scientist, I/c Animal House
- Dr R K Vaid, Principal Scientist- Scientist from different biological Discipline & Member Secretary

**Proposals submitted by scientists for the consideration and approval to IAEC**

| S.No | Name of the project                                                                                                                              | Project | Principal Investigator | Requirement                                                                                                                                                                                                                                                                                                                                 |
|------|--------------------------------------------------------------------------------------------------------------------------------------------------|---------|------------------------|---------------------------------------------------------------------------------------------------------------------------------------------------------------------------------------------------------------------------------------------------------------------------------------------------------------------------------------------|
| 1    | Surveillance, monitoring and control of emerging and exiting diseases of equines                                                                 | ICAR    | Dr Harisankar Singha   | Guinea pig- 40, Rabbit-8, Mother Swiss Albino mouse= 20, Suckling Swiss albino babies- 100, Swiss Albino (either sex)- 52 BALB/c mice- 60 (either sex)<br>Geese-9,<br>Poultry bird-10<br>Sheep-1<br>Horse (2) -for blood around 10ml for <i>in vitro</i> cultivation of Theileria parasite<br>(*Horse & sheep from available stock at farm) |
| 2.   | Identification and evaluation of target specific novel drug molecules against <i>Trypanosoma evansi</i> infection using nanotechnology approach. | ICAR    | Dr Rajender Kumar      | Swiss Albino Mice -72<br>Rat- 72                                                                                                                                                                                                                                                                                                            |
| 3.   | Development of multi-species ELISA for diagnosis of <i>Trypanosoma</i>                                                                           | ICAR    | Dr Rajender Kumar      | Swiss Albino mice - 18<br>BALB/c mice -18                                                                                                                                                                                                                                                                                                   |

|    |                                                                                                                                                                                                                    |      |                  |                                             |
|----|--------------------------------------------------------------------------------------------------------------------------------------------------------------------------------------------------------------------|------|------------------|---------------------------------------------|
|    | <i>evansi</i> infection in different livestock species.                                                                                                                                                            |      |                  |                                             |
| 4. | Elucidating therapeutic role of bacteriophages and encoded endolysins against multidrug resistant enteric pathogens of poultry (Lal Bahadur Shastri Challenge Project) (renewal of the project from previous year) | ICAR | Dr Taruna Anand  | Poultry birds- 130<br>Swiss Albino mice -34 |
| 5. | Development of bacteriophage repository and exploring the therapeutic potential of phages and their encoded endolysins (Institutional project). (renewal of the project from previous year)                        | ICAR | Dr Taruna Anand  | Swiss Albino mice – 44                      |
| 6. | Topical delivery of bacteriophages for treatment of MDR skin and wound infections (Project to be submitted for External funding)                                                                                   | ICAR | Dr Taruna Anand  | Swiss Albino mice- 20                       |
| 7  | Assessment of Antiviral Effect of Selected Drug Molecules in Mitigating Pathology Induced by Equine Influenza Virus Infection in Murine Model                                                                      | ICAR | Dr Nitin Virmani | BALB/c mice<br>Either sex<br>Number: 267    |
| 8. | Phenotypic and genotypic authentication and preservation of network bacterial isolates"                                                                                                                            | ICAR | Dr R. K. Vaid    | BALB/c Mice: 100;<br>NZ White Rabbits: 2    |

\*During the inspection of Small Animal Facility, the Committee suggested installation of CCTV cameras in the premises which is requirement of CPCSEA.

  
(Anil Kamboj)  
(Non-Scientific Socially Aware Member)

  
(Sanjay Kumar)  
Veterinarian

  
(Harbans Lal)

Main CPCSEA Nominee

  
(Balwinder Kumar)  
I/c Animal House

  
(R K Vaid)  
Scientist from different biological Discipline  
& Member Secretary

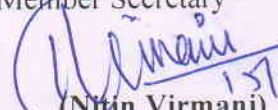  
(Nitin Virmani)  
15/02/2020

Chairman, IAEC (ICAR-NRCE, Hisar)
